# Supplementary material
Source: Springer Nature journal article supplement (https://www.springermedizin.de/resource/supplementary/12955_2013_1168_MOESM2_ESM.pdf/9558920)
Supplement: MOESM2 [file 9558920]

## *A priori* defined approach

## Result

### Conceptual level

Critical evaluation of items relative to a pre-defined framework

*Here: Self-reported capacity to perform activities based on the ICF*

Removal of 3 items

Pain intensity

Headaches

Sleeping

### Rasch analysis

Identification of misfitting items, and exploration of cause of misfit

*Here: DIF, disordered response thresholds, location dependence, multidimensionality, statistical redundancy*

Removal of 2 items

Reading (due to considerable DIF)

Lifting (due to statistical redundancy)

NDI- 5: Excellent fit to Raschmodel

### Classical test theory

Establish properties of shortened scale with CTT-based approaches

*Here: Stability, responsiveness, concurrent validity*

Properties of NDI-5 based on CTT statistically similar to those of original NDI-10.
